# Supplementary material for: Development of a capture sequencing assay for enhanced detection and genotyping of tick-borne pathogens
Source: PubMed Central journal article supplement (PMC8196166; doi:10.1038/s41598-021-91956-z), 2021-06-11
Supplement: 41598_2021_91956_MOESM1_ESM.pdf [file 41598_2021_91956_MOESM1_ESM.pdf]

## SUPPLEMENTARY INFORMATION

Development of a capture sequencing assay for enhanced detection and genotyping of tick-borne pathogens.

Komal Jain<sup>1</sup>, Teresa Tagliafierro<sup>1</sup>, Adriana Marques<sup>2</sup>, Santiago Sanchez-Vicente<sup>1</sup>, Alper Gokden<sup>1</sup>, Brian Fallon<sup>3</sup>, Nischay Mishra<sup>1,4</sup>, Thomas Briese<sup>1</sup>, Vishal Kapoor<sup>1</sup>, Stephen Sameroff<sup>1</sup>, Cheng Guo<sup>1</sup>, Luis A. Marcos<sup>5</sup>, Linden Hu<sup>6</sup>, W. Ian Lipkin<sup>1,4</sup>, Rafal Tokarz<sup>1,4</sup>

<sup>1</sup>Center for Infection and Immunity, Mailman School of Public Health, Columbia University, New York, NY

<sup>2</sup>Laboratory of Clinical Immunology and Microbiology, National Institute of Allergy and Infectious Diseases, National Institutes of Health, Bethesda, Maryland.

<sup>3</sup>Department of Psychiatry, Columbia University, New York, NY

<sup>4</sup>Department of Epidemiology, Mailman School of Public Health, Columbia University, New York, NY

<sup>5</sup>Department of Medicine (Division of Infectious Diseases) and Department of Microbiology and Immunology, State University of New York at Stony Brook, Stony Brook, NY

<sup>6</sup>Department of Molecular Biology and Microbiology, Tufts University, Boston, Massachusetts, USA.

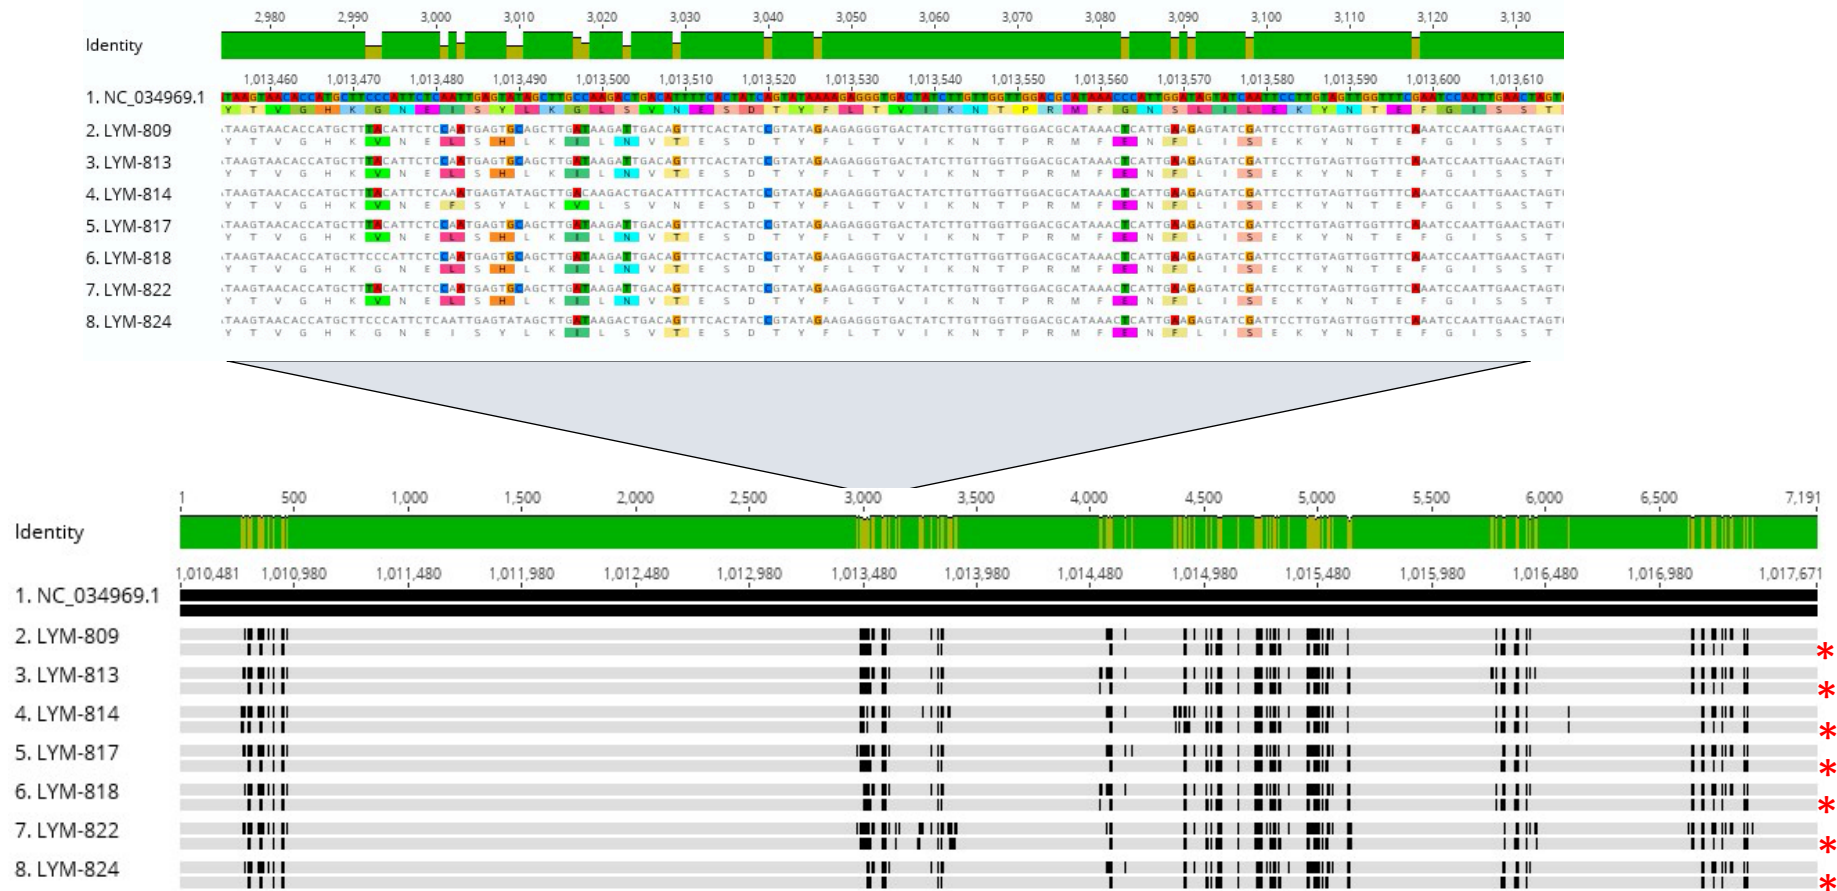

**Supplementary Fig. S1.** Alignment of *B. microti bmn 1-15* sequences recovered by TBDCapSeq from clinical samples. Shown are seven sequences (LYM-809, LYM-813, LYM-814, LYM-817, LYM-818, LYM-822 and LYM-824) aligned to a reference sequence NC\_034969 (www.ncbi.nlm.nih.gov). The bottom alignment consists of the complete open reading frame (position 1-7191), with nucleotide sequence (top) and their amino acid translations (bottom-with asterisk). Discrepancies to the reference sequence are highlighted in black. The top alignment displays an enlarged portion of the region between nt 2650 and 3070 with variant nucleotides and amino acids displayed in color. Assemblies were performed in Geneious v 10.0.9 ([www.geneious.com](http://www.geneious.com)).

**Supplementary Table S1.** Comparison of TBDCapSeq vs qPCR and UHTS for surveillance of infected ticks.

|                                                       |                                                  | Sample ID                 | NYT-149                        | NYT-150                        | NYT-209                        | NYT-219                        | NYT-224                        | NYT-243                             | NYT-245                             | NYT-246                             | NYT-285                               | NYT-328                             |        |
|-------------------------------------------------------|--------------------------------------------------|---------------------------|--------------------------------|--------------------------------|--------------------------------|--------------------------------|--------------------------------|-------------------------------------|-------------------------------------|-------------------------------------|---------------------------------------|-------------------------------------|--------|
|                                                       |                                                  | Sample type               | <i>Ixodes scapularis</i> nymph | <i>Ixodes scapularis</i> nymph | <i>Ixodes scapularis</i> nymph | <i>Ixodes scapularis</i> nymph | <i>Ixodes scapularis</i> nymph | <i>Ixodes scapularis</i> adult male | <i>Ixodes scapularis</i> adult male | <i>Ixodes scapularis</i> adult male | <i>Ixodes scapularis</i> adult female | <i>Ixodes scapularis</i> adult male |        |
| Unbiased Sequencing                                   | Reads per million filtered reads                 | Total raw reads           | ND                             | ND                             | ND                             | ND                             | ND                             | ND                                  | ND                                  | ND                                  | ND                                    | ND                                  |        |
|                                                       |                                                  | # Reads after Filtration  | ND                             | ND                             | ND                             | ND                             | ND                             | ND                                  | ND                                  | ND                                  | ND                                    | ND                                  | ND     |
|                                                       |                                                  | <i>B. burgdorferi</i>     | ND                             | ND                             | ND                             | ND                             | ND                             | ND                                  | ND                                  | ND                                  | ND                                    | ND                                  | ND     |
|                                                       |                                                  | <i>B. miyamotoi</i>       | ND                             | ND                             | ND                             | ND                             | ND                             | ND                                  | ND                                  | ND                                  | ND                                    | ND                                  | ND     |
|                                                       |                                                  | Powassan virus            | ND                             | ND                             | ND                             | ND                             | ND                             | ND                                  | ND                                  | ND                                  | ND                                    | ND                                  | ND     |
|                                                       |                                                  | <i>A. phagocytophilum</i> | ND                             | ND                             | ND                             | ND                             | ND                             | ND                                  | ND                                  | ND                                  | ND                                    | ND                                  | ND     |
|                                                       |                                                  | <i>B. microti</i>         | ND                             | ND                             | ND                             | ND                             | ND                             | ND                                  | ND                                  | ND                                  | ND                                    | ND                                  | ND     |
|                                                       |                                                  | <i>B. odocoilei</i>       | ND                             | ND                             | ND                             | ND                             | ND                             | ND                                  | ND                                  | ND                                  | ND                                    | ND                                  | ND     |
|                                                       |                                                  | <i>Rickettsia</i>         | ND                             | ND                             | ND                             | ND                             | ND                             | ND                                  | ND                                  | ND                                  | ND                                    | ND                                  |        |
| Capture Sequencing (fold enrichment relative to UHTS) | Reads per million filtered reads (fold increase) | Total raw reads           | 3,374,160                      | 3,365,391                      | 4,333,176                      | 31,183,867                     | 8,107,305                      | 3,440,268                           | 3,945,563                           | 1,017,337                           | 5,930,917                             | 1,638,322                           |        |
|                                                       |                                                  | # Reads after Filtration  | 2,967,017                      | 2,999,786                      | 3,934,890                      | 28,087,631                     | 7,317,302                      | 3,165,477                           | 3,540,779                           | 904,830                             | 5,432,860                             | 1,470,345                           |        |
|                                                       |                                                  | <i>B. burgdorferi</i>     | -                              | 138,174                        | 4,891                          | 17,796                         | 64,052                         | 406,056                             | -                                   | -                                   | 114,839                               | -                                   | -      |
|                                                       |                                                  | <i>B. miyamotoi</i>       | -                              | -                              | 546,825                        | -                              | -                              | -                                   | -                                   | -                                   | -                                     | -                                   | -      |
|                                                       |                                                  | Powassan virus            | -                              | -                              | -                              | -                              | -                              | -                                   | 654,136                             | -                                   | -                                     | -                                   | -      |
|                                                       |                                                  | <i>A. phagocytophilum</i> | -                              | -                              | -                              | -                              | 161,478                        | -                                   | -                                   | -                                   | -                                     | -                                   | 69,578 |
|                                                       |                                                  | <i>B. microti</i>         | 156,421                        | -                              | -                              | 783,424                        | -                              | -                                   | -                                   | -                                   | -                                     | -                                   | -      |
|                                                       |                                                  | <i>B. odocoilei</i>       | -                              | -                              | -                              | -                              | -                              | -                                   | -                                   | -                                   | -                                     | -                                   | -      |
|                                                       |                                                  | <i>Rickettsia</i>         | 22,737                         | 15,717                         | 2,354                          | 488                            | 11,930                         | -                                   | -                                   | -                                   | 41,949                                | 9,009                               |        |
| RT-PCR results (Ct)                                   |                                                  | <i>B. burgdorferi</i>     | -                              | Pos (29.64)                    | Pos (29.58)                    | Pos (30.98)                    | Pos (29.00)                    | Pos (24.73)                         | -                                   | -                                   | Pos (25.64)                           | -                                   |        |
|                                                       |                                                  | <i>B. miyamotoi</i>       | -                              | -                              | Pos (26.33)                    | -                              | -                              | -                                   | -                                   | -                                   | -                                     | -                                   |        |
|                                                       |                                                  | Powassan virus            | -                              | -                              | -                              | -                              | -                              | -                                   | Pos (24.27)                         | -                                   | -                                     | -                                   |        |
|                                                       |                                                  | <i>A. phagocytophilum</i> | -                              | -                              | -                              | -                              | Pos (18.19)                    | -                                   | -                                   | -                                   | Pos (30.09)                           | Pos (19.77)                         |        |
|                                                       |                                                  | <i>B. microti</i>         | Pos (28.45)                    | -                              | -                              | Pos (25.64)                    | -                              | -                                   | -                                   | -                                   | -                                     | -                                   |        |

ND - not done

**Supplementary Table S1.** Comparison of TBDCapSeq vs qPCR and UHTS for surveillance of infected ticks (continuation).

|                                                       |                                                  | Sample ID                 | NYT-380                                    | NYT-381                                    | NYT-382                                    | NYT-435                                | NYT-436                                | RTS-619                               | RTS-689                             | RTS-694                               | RTS-695                               | RTS-706                               |
|-------------------------------------------------------|--------------------------------------------------|---------------------------|--------------------------------------------|--------------------------------------------|--------------------------------------------|----------------------------------------|----------------------------------------|---------------------------------------|-------------------------------------|---------------------------------------|---------------------------------------|---------------------------------------|
|                                                       |                                                  | Sample type               | <i>Dermacentor variabilis</i> adult female | <i>Dermacentor variabilis</i> adult female | <i>Dermacentor variabilis</i> adult female | <i>Amblyomma americanum</i> adult pool | <i>Amblyomma americanum</i> nymph pool | <i>Ixodes scapularis</i> adult female | <i>Ixodes scapularis</i> adult male | <i>Ixodes scapularis</i> adult female | <i>Ixodes scapularis</i> adult female | <i>Ixodes scapularis</i> adult female |
| Unbiased Sequencing                                   | Reads per million filtered reads                 | Total raw reads           | ND                                         | ND                                         | ND                                         | ND                                     | ND                                     | 16,825,510                            | 8,042,901                           | 5,191,483                             | 6,253,426                             | 8,217,771                             |
|                                                       |                                                  | # Reads after Filtration  | ND                                         | ND                                         | ND                                         | ND                                     | ND                                     | 15,427,713                            | 7,485,930                           | 4,851,515                             | 5,889,894                             | 7,705,660                             |
|                                                       |                                                  | <i>B. burgdorferi</i>     | ND                                         | ND                                         | ND                                         | ND                                     | ND                                     | 341                                   | 103                                 | 0                                     | 114                                   | -                                     |
|                                                       |                                                  | <i>B. miyamotoi</i>       | ND                                         | ND                                         | ND                                         | ND                                     | ND                                     | -                                     | -                                   | 4,071                                 | -                                     | -                                     |
|                                                       |                                                  | Powassan virus            | ND                                         | ND                                         | ND                                         | ND                                     | ND                                     | 13,584                                | -                                   | 0                                     | -                                     | -                                     |
|                                                       |                                                  | <i>A. phagocytophilum</i> | ND                                         | ND                                         | ND                                         | ND                                     | ND                                     | 91                                    | -                                   | 420                                   | 1,688                                 | -                                     |
|                                                       |                                                  | <i>B. microti</i>         | ND                                         | ND                                         | ND                                         | ND                                     | ND                                     | -                                     | -                                   | 0                                     | 2,914                                 | -                                     |
|                                                       |                                                  | <i>B. odocoilei</i>       | ND                                         | ND                                         | ND                                         | ND                                     | ND                                     | 410                                   | -                                   | 0                                     | 0                                     | 1,386                                 |
| Capture Sequencing (fold enrichment relative to UHTS) | Reads per million filtered reads (fold increase) | Total raw reads           | 1,778,385                                  | 1,607,649                                  | 1,571,138                                  | 7,131,575                              | 3,312,333                              | 7,730,715                             | 22,780,772                          | 10,430,420                            | 25,182,055                            | 11,802,060                            |
|                                                       |                                                  | # Reads after Filtration  | 1,614,403                                  | 1,458,241                                  | 1,416,267                                  | 6,622,463                              | 3,036,827                              | 7,038,868                             | 21,211,157                          | 9,751,093                             | 23,243,365                            | 10,701,822                            |
|                                                       |                                                  | <i>B. burgdorferi</i>     | -                                          | -                                          | -                                          | -                                      | -                                      | 25,179 (73.8)                         | 3,901 (37.9)                        | -                                     | 4,514 (39.7)                          | -                                     |
|                                                       |                                                  | <i>B. miyamotoi</i>       | -                                          | -                                          | -                                          | -                                      | -                                      | -                                     | -                                   | 329,154 (80.8)                        | -                                     | -                                     |
|                                                       |                                                  | Powassan virus            | -                                          | -                                          | -                                          | -                                      | -                                      | 708,945 (52.2)                        | -                                   | -                                     | -                                     | -                                     |
|                                                       |                                                  | <i>A. phagocytophilum</i> | -                                          | -                                          | -                                          | -                                      | -                                      | 5,389 (59.1)                          | -                                   | 22,200 (52.8)                         | 34,622 (20.5)                         | -                                     |
|                                                       |                                                  | <i>B. microti</i>         | -                                          | -                                          | -                                          | -                                      | -                                      | -                                     | -                                   | -                                     | 74,187 (25.5)                         | -                                     |
|                                                       |                                                  | <i>B. odocoilei</i>       | -                                          | -                                          | -                                          | -                                      | -                                      | 3,950 (9.6)                           | -                                   | -                                     | -                                     | 7,492 (5.4)                           |
| RT-PCR results (Ct)                                   |                                                  | <i>Rickettsia</i>         | -                                          | 201                                        | -                                          | 11,475                                 | 2,625                                  | 815 (39.1)                            | 84,865 (17.7)                       | 42,869 (37.4)                         | 68,643 (21.1)                         | 40,359 (34.9)                         |
|                                                       |                                                  | <i>B. burgdorferi</i>     | -                                          | -                                          | -                                          | -                                      | -                                      | Pos (31.06)                           | -                                   | -                                     | -                                     | -                                     |
|                                                       |                                                  | <i>B. miyamotoi</i>       | -                                          | -                                          | -                                          | -                                      | -                                      | -                                     | -                                   | Pos (26.02)                           | -                                     | -                                     |
|                                                       |                                                  | Powassan virus            | -                                          | -                                          | -                                          | -                                      | -                                      | Pos (26.57)                           | -                                   | -                                     | -                                     | -                                     |
|                                                       |                                                  | <i>A. phagocytophilum</i> | -                                          | -                                          | -                                          | -                                      | -                                      | Pos (26.2)                            | -                                   | Pos (18.98)                           | Pos (15.68)                           | -                                     |
| <i>B. microti</i>                                     | -                                                | -                         | -                                          | -                                          | -                                          | -                                      | -                                      | -                                     | Pos (25.08)                         | -                                     |                                       |                                       |

ND - not done

**Supplementary Table S2.** Serial dilution experiments with *B. microti*

| Sample             | Number rawfastq reads | Number input reads | Number of unique mapped reads (% mapped) | Number mapped reads | Reference Name (reference length) | Length Genome Recovered | % genome recovered | qPCR Ct  |
|--------------------|-----------------------|--------------------|------------------------------------------|---------------------|-----------------------------------|-------------------------|--------------------|----------|
| LYM-809-1          | 63,092,901            | 54,926,856         | 43,416,904 (79.05%)                      | 8,905,599           | NC_027205 (1,304,281)             | 1,304,181               | 99.99%             | 23.01    |
|                    |                       |                    |                                          | 10,107,952          | NC_027206 (1,508,385)             | 1,508,133               | 99.98%             |          |
|                    |                       |                    |                                          | 11,973,552          | NC_027207 (1,763,809)             | 1,763,809               | 99.85%             |          |
|                    |                       |                    |                                          | 12,320,825          | NC_034969 (1,816,206)             | 1,815,055               | 99.94%             |          |
| LYM-809-2          | 25,466,254            | 21,095,128         | 8,885,664 (42.12%)                       | 1,825,592           | NC_027205 (1,304,281)             | 1,299,343               | 99.62%             | NOT DONE |
|                    |                       |                    |                                          | 2,071,503           | NC_027206 (1,508,385)             | 1,499,825               | 99.43%             |          |
|                    |                       |                    |                                          | 2,476,634           | NC_027207 (1,763,809)             | 1,754,806               | 99.34%             |          |
|                    |                       |                    |                                          | 2,482,592           | NC_034969 (1,816,206)             | 1,806,164               | 99.45%             |          |
| LYM-809-3          | 14,840,955            | 11,710,156         | 159,414 (1.36%)                          | 29,181              | NC_027205 (1,304,281)             | 156,398                 | 11.99%             | NOT DONE |
|                    |                       |                    |                                          | 35,480              | NC_027206 (1,508,385)             | 177,153                 | 11.75%             |          |
|                    |                       |                    |                                          | 51,580              | NC_027207 (1,763,809)             | 211,641                 | 11.98%             |          |
|                    |                       |                    |                                          | 42,699              | NC_034969 (1,816,206)             | 218,186                 | 12.01%             |          |
| LYM-809-4          | 13,104,169            | 10,440,591         | 95,345 (0.10%)                           | 14,985              | NC_027205 (1,304,281)             | 84,571                  | 6.48%              | NOT DONE |
|                    |                       |                    |                                          | 20,721              | NC_027206 (1,508,385)             | 112,116                 | 7.43%              |          |
|                    |                       |                    |                                          | 36,236              | NC_027207 (1,763,809)             | 144,527                 | 8.18%              |          |
|                    |                       |                    |                                          | 23,114              | NC_034969 (1,816,206)             | 124,060                 | 6.83%              |          |
| LYM-809-5          | 13,744,779            | 10,721,711         | 32,409 (0.30%)                           | 4,100               | NC_027205 (1,304,281)             | 24,230                  | 1.86%              | NOT DONE |
|                    |                       |                    |                                          | 5,507               | NC_027206 (1,508,385)             | 30,352                  | 2.01%              |          |
|                    |                       |                    |                                          | 17,124              | NC_027207 (1,763,809)             | 36,397                  | 2.06%              |          |
|                    |                       |                    |                                          | 5,611               | NC_034969 (1,816,206)             | 30,767                  | 1.69%              |          |
| LYM-809-6          | 12,385,307            | 9,843,502          | 19,768 (0.20%)                           | 2,041               | NC_027205 (1,304,281)             | 11,732                  | 0.90%              | 36.85    |
|                    |                       |                    |                                          | 2,568               | NC_027206 (1,508,385)             | 14,086                  | 0.93%              |          |
|                    |                       |                    |                                          | 13,095              | NC_027207 (1,763,809)             | 18,683                  | 1.06%              |          |
|                    |                       |                    |                                          | 1,950               | NC_034969 (1,816,206)             | 11,002                  | 0.61%              |          |
| LYM-809-7          | 11,914,908            | 9,451,396          | 12,554 (0.13%)                           | 424                 | NC_027205 (1,304,281)             | 2,464                   | 0.19%              | 38.1     |
|                    |                       |                    |                                          | 480                 | NC_027206 (1,508,385)             | 3,709                   | 0.25%              |          |
|                    |                       |                    |                                          | 11,356              | NC_027207 (1,763,809)             | 7,882                   | 0.45%              |          |
|                    |                       |                    |                                          | 294                 | NC_034969 (1,816,206)             | 1,963                   | 0.11%              |          |
| LYM-809-8          | 12,914,339            | 10,208,926         | 10,400 (0.10%)                           | 2                   | NC_027205 (1,304,281)             | 284                     | 0.02%              | NEGATIVE |
|                    |                       |                    |                                          | 45                  | NC_027206 (1,508,385)             | 335                     | 0.02%              |          |
|                    |                       |                    |                                          | 10,336              | NC_027207 (1,763,809)             | 5,341                   | 0.30%              |          |
|                    |                       |                    |                                          | 17                  | NC_034969 (1,816,206)             | 142                     | 0.01%              |          |
| LYM-813-1          | 113,600,674           | 100,768,336        | 89,237,158 (88.56%)                      | 18,213,981          | NC_027205 (1,304,281)             | 1,304,211               | 100.00%            | 23.16    |
|                    |                       |                    |                                          | 20,815,876          | NC_027206 (1,508,385)             | 1,508,147               | 99.98%             |          |
|                    |                       |                    |                                          | 24,626,856          | NC_027207 (1,763,809)             | 1,763,831               | 99.85%             |          |
|                    |                       |                    |                                          | 25,269,761          | NC_034969 (1,816,206)             | 1,815,078               | 99.94%             |          |
| LYM-813-2          | 39,064,619            | 34,023,940         | 23,942,511 (70.37%)                      | 4,888,370           | NC_027205 (1,304,281)             | 1,304,183               | 99.99%             | 25.58    |
|                    |                       |                    |                                          | 5,571,830           | NC_027206 (1,508,385)             | 1,508,117               | 99.98%             |          |
|                    |                       |                    |                                          | 6,648,132           | NC_027207 (1,763,809)             | 1,763,651               | 99.84%             |          |
|                    |                       |                    |                                          | 6,768,021           | NC_034969 (1,816,206)             | 1,814,974               | 99.93%             |          |
| LYM-813-3          | 16,704,258            | 13,566,946         | 2,344,511 (17.28%)                       | 479,935             | NC_027205 (1,304,281)             | 1,069,353               | 81.99%             | 27.23    |
|                    |                       |                    |                                          | 542,730             | NC_027206 (1,508,385)             | 1,217,288               | 80.70%             |          |
|                    |                       |                    |                                          | 651,796             | NC_027207 (1,763,809)             | 1,433,680               | 81.16%             |          |
|                    |                       |                    |                                          | 661,831             | NC_034969 (1,816,206)             | 1,473,271               | 81.12%             |          |
| LYM-813-4          | 19,057,117            | 15,062,202         | 501,790 (3.33%)                          | 103,202             | NC_027205 (1,304,281)             | 407,930                 | 31.28%             | 30.15    |
|                    |                       |                    |                                          | 111,387             | NC_027206 (1,508,385)             | 443,655                 | 29.41%             |          |
|                    |                       |                    |                                          | 146,826             | NC_027207 (1,763,809)             | 533,512                 | 30.20%             |          |
|                    |                       |                    |                                          | 138,285             | NC_034969 (1,816,206)             | 551,416                 | 30.36%             |          |
| LYM-813-5          | 17,351,276            | 13,600,010         | 87,680 (0.65%)                           | 14,408              | NC_027205 (1,304,281)             | 71,234                  | 5.46%              | 31.28    |
|                    |                       |                    |                                          | 17,220              | NC_027206 (1,508,385)             | 83,605                  | 5.54%              |          |
|                    |                       |                    |                                          | 32,748              | NC_027207 (1,763,809)             | 94,032                  | 5.32%              |          |
|                    |                       |                    |                                          | 22,924              | NC_034969 (1,816,206)             | 108,424                 | 5.97%              |          |
| LYM-813-6          | 18,969,775            | 14,973,275         | 40,258 (0.27%)                           | 4,805               | NC_027205 (1,304,281)             | 29,914                  | 2.29%              | 33.42    |
|                    |                       |                    |                                          | 4,457               | NC_027206 (1,508,385)             | 22,397                  | 1.49%              |          |
|                    |                       |                    |                                          | 24,176              | NC_027207 (1,763,809)             | 42,727                  | 2.42%              |          |
|                    |                       |                    |                                          | 6,647               | NC_034969 (1,816,206)             | 33,510                  | 1.85%              |          |
| LYM-813-7          | 16,602,699            | 13,093,379         | 19,988 (0.15%)                           | 1,152               | NC_027205 (1,304,281)             | 7,593                   | 0.58%              | 37.12    |
|                    |                       |                    |                                          | 1,111               | NC_027206 (1,508,385)             | 6,209                   | 0.41%              |          |
|                    |                       |                    |                                          | 16,044              | NC_027207 (1,763,809)             | 11,027                  | 0.62%              |          |
|                    |                       |                    |                                          | 1,673               | NC_034969 (1,816,206)             | 9,280                   | 0.51%              |          |
| LYM-813-8          | 15,389,067            | 11,912,012         | 15,521 (0.13%)                           | 197                 | NC_027205 (1,304,281)             | 1,477                   | 0.11%              | 38.86    |
|                    |                       |                    |                                          | 229                 | NC_027206 (1,508,385)             | 1,117                   | 0.07%              |          |
|                    |                       |                    |                                          | 14,553              | NC_027207 (1,763,809)             | 6,722                   | 0.38%              |          |
|                    |                       |                    |                                          | 542                 | NC_034969 (1,816,206)             | 2,881                   | 0.16%              |          |
| Salmon Sperm DNA   | 21,881,921            | 10,261,592         | 36,536 (0.36%)                           | 4                   | NC_027205 (1,304,281)             | 542                     | 0.04%              | NOT DONE |
|                    |                       |                    |                                          | 5                   | NC_027206 (1,508,385)             | 679                     | 0.05%              |          |
|                    |                       |                    |                                          | 36,312*             | NC_027207 (1,763,809)             | 7,072                   | 0.40%              |          |
|                    |                       |                    |                                          | 122                 | NC_034969 (1,816,206)             | 1096                    | 0.06%              |          |
| Extraction Control | 14,326,099            | 11,332,867         | 13,058 (0.12%)                           | 62                  | NC_027205 (1,304,281)             | 426                     | 0.03%              | NOT DONE |
|                    |                       |                    |                                          | 41                  | NC_027206 (1,508,385)             | 142                     | 0.01%              |          |
|                    |                       |                    |                                          | 12,955*             | NC_027207 (1,763,809)             | 3,959                   | 0.22%              |          |
|                    |                       |                    |                                          | 0                   | NC_034969 (1,816,206)             | 0                       | 0.00%              |          |

\*reads mapped to host (human) 18S rRNA and 28S rRNA

Supplementary Table S3. TBDCapSeq analysis of whole blood samples from patients with babesiosis.

| Sample Name                | Sample ID        | Ct    | Percentage of mapped reads to <i>B. microti</i> | Number of mapped reads | Ref. Name                  | Genome recovered (%) |
|----------------------------|------------------|-------|-------------------------------------------------|------------------------|----------------------------|----------------------|
| HEALTHY CONTROL            | Neg Control      | ND    | 0.231                                           | 0                      | NC_027205 (chromosome I)   | 0.00%                |
|                            | Neg Control      |       |                                                 | 0                      | NC_027206 (chromosome II)  | 0.00%                |
|                            | Neg Control      |       |                                                 | 1251*                  | NC_027207 (chromosome III) | 0.25%                |
|                            | Neg Control      |       |                                                 | 0                      | NC_034969 (chromosome IV)  | 0.00%                |
| PATIENT 1                  | LYM-822          | 23.41 | 81.179                                          | 335,619                | NC_027205 (chromosome I)   | 99.99%               |
|                            | LYM-822          |       |                                                 | 382,555                | NC_027206 (chromosome II)  | 99.97%               |
|                            | LYM-822          |       |                                                 | 451,283                | NC_027207 (chromosome III) | 99.85%               |
|                            | LYM-822          |       |                                                 | 463,049                | NC_034969 (chromosome IV)  | 99.93%               |
| PATIENT 1 FOLLOW UP VISIT  | LYM-819          | NA    | 0.322                                           | 64                     | NC_027205 (chromosome I)   | 0.49%                |
|                            | LYM-819          |       |                                                 | 87                     | NC_027206 (chromosome II)  | 0.53%                |
|                            | LYM-819          |       |                                                 | 1,265                  | NC_027207 (chromosome III) | 0.89%                |
|                            | LYM-819          |       |                                                 | 161                    | NC_034969 (chromosome IV)  | 0.68%                |
| PATIENT 2                  | LYM-813          | 17.84 | 98.931                                          | 12,200,073             | NC_027205 (chromosome I)   | 100.00%              |
|                            | LYM-813          |       |                                                 | 13,853,115             | NC_027206 (chromosome II)  | 99.98%               |
|                            | LYM-813          |       |                                                 | 16,391,885             | NC_027207 (chromosome III) | 99.85%               |
|                            | LYM-813          |       |                                                 | 16,895,013             | NC_034969 (chromosome IV)  | 99.94%               |
| PATIENT 2 FOLLOW UP VISIT  | LYM-826          | NA    | 0.19                                            | 137                    | NC_027205 (chromosome I)   | 0.92%                |
|                            | LYM-826          |       |                                                 | 161                    | NC_027206 (chromosome II)  | 0.83%                |
|                            | LYM-826          |       |                                                 | 1,141                  | NC_027207 (chromosome III) | 0.91%                |
|                            | LYM-826          |       |                                                 | 172                    | NC_034969 (chromosome IV)  | 0.80%                |
| PATIENT 3                  | LYM-811          | 35.15 | 0.481                                           | 149                    | NC_027205 (chromosome I)   | 0.96%                |
|                            | LYM-811          |       |                                                 | 124                    | NC_027206 (chromosome II)  | 0.72%                |
|                            | LYM-811          |       |                                                 | 1,815                  | NC_027207 (chromosome III) | 1.26%                |
|                            | LYM-811          |       |                                                 | 193                    | NC_034969 (chromosome IV)  | 1.02%                |
| PATIENT 3 FOLLOW UP VISIT  | LYM-810          | NA    | 0.512                                           | 113                    | NC_027205 (chromosome I)   | 0.74%                |
|                            | LYM-810          |       |                                                 | 132                    | NC_027206 (chromosome II)  | 0.79%                |
|                            | LYM-810          |       |                                                 | 1,645                  | NC_027207 (chromosome III) | 1.34%                |
|                            | LYM-810          |       |                                                 | 226                    | NC_034969 (chromosome IV)  | 0.94%                |
| PATIENT 4                  | LYM-809          | 19.32 | 97.558                                          | 5,186,474              | NC_027205 (chromosome I)   | 100.00%              |
|                            | LYM-809          |       |                                                 | 5,867,246              | NC_027206 (chromosome II)  | 99.98%               |
|                            | LYM-809          |       |                                                 | 6,975,669              | NC_027207 (chromosome III) | 99.86%               |
|                            | LYM-809          |       |                                                 | 7,174,369              | NC_034969 (chromosome IV)  | 99.93%               |
| PATIENT 5                  | LYM-813          | 17.84 | 98.931                                          | 12,200,073             | NC_027205 (chromosome I)   | 100.00%              |
|                            | LYM-813          |       |                                                 | 13,853,115             | NC_027206 (chromosome II)  | 99.98%               |
|                            | LYM-813          |       |                                                 | 16,391,885             | NC_027207 (chromosome III) | 99.85%               |
|                            | LYM-813          |       |                                                 | 16,895,013             | NC_034969 (chromosome IV)  | 99.94%               |
| PATIENT 6                  | LYM-814          | 22.88 | 84.721                                          | 403,215                | NC_027205 (chromosome I)   | 99.99%               |
|                            | LYM-814          |       |                                                 | 458,123                | NC_027206 (chromosome II)  | 99.98%               |
|                            | LYM-814          |       |                                                 | 545,801                | NC_027207 (chromosome III) | 99.84%               |
|                            | LYM-814          |       |                                                 | 561,845                | NC_034969 (chromosome IV)  | 99.92%               |
| PATIENT 7                  | LYM-815          | 21.72 | 87.493                                          | 627,894                | NC_027205 (chromosome I)   | 99.99%               |
|                            | LYM-815          |       |                                                 | 715,626                | NC_027206 (chromosome II)  | 99.98%               |
|                            | LYM-815          |       |                                                 | 850,275                | NC_027207 (chromosome III) | 99.85%               |
|                            | LYM-815          |       |                                                 | 876,962                | NC_034969 (chromosome IV)  | 99.93%               |
| PATIENT 8                  | LYM-816          | 22.67 | 91.585                                          | 938,495                | NC_027205 (chromosome I)   | 99.99%               |
|                            | LYM-816          |       |                                                 | 1,069,502              | NC_027206 (chromosome II)  | 99.98%               |
|                            | LYM-816          |       |                                                 | 1,281,236              | NC_027207 (chromosome III) | 99.85%               |
|                            | LYM-816          |       |                                                 | 1,305,914              | NC_034969 (chromosome IV)  | 99.93%               |
| PATIENT 9                  | LYM-817          | ND    | 96.571                                          | 4,342,838              | NC_027205 (chromosome I)   | 100.00%              |
|                            | LYM-817          |       |                                                 | 4,971,311              | NC_027206 (chromosome II)  | 99.98%               |
|                            | LYM-817          |       |                                                 | 5,880,114              | NC_027207 (chromosome III) | 99.86%               |
|                            | LYM-817          |       |                                                 | 6,087,173              | NC_034969 (chromosome IV)  | 99.94%               |
| PATIENT 10                 | LYM-818          | 18.65 | 98.745                                          | 15,581,725             | NC_027205 (chromosome I)   | 100.00%              |
|                            | LYM-818          |       |                                                 | 17,486,839             | NC_027206 (chromosome II)  | 99.99%               |
|                            | LYM-818          |       |                                                 | 20,874,686             | NC_027207 (chromosome III) | 99.86%               |
|                            | LYM-818          |       |                                                 | 21,331,613             | NC_034969 (chromosome IV)  | 99.94%               |
| PATIENT 11                 | LYM-821          | 38.47 | 0.487                                           | 250                    | NC_027205 (chromosome I)   | 1.56%                |
|                            | LYM-821          |       |                                                 | 273                    | NC_027206 (chromosome II)  | 1.40%                |
|                            | LYM-821          |       |                                                 | 1,612                  | NC_027207 (chromosome III) | 1.53%                |
|                            | LYM-821          |       |                                                 | 288                    | NC_034969 (chromosome IV)  | 1.41%                |
| PATIENT 12                 | LYM-824          | 18.07 | 98.496                                          | 10,649,119             | NC_027205 (chromosome I)   | 100.00%              |
|                            | LYM-824          |       |                                                 | 12,176,315             | NC_027206 (chromosome II)  | 99.99%               |
|                            | LYM-824          |       |                                                 | 14,377,969             | NC_027207 (chromosome III) | 99.86%               |
|                            | LYM-824          |       |                                                 | 14,820,064             | NC_034969 (chromosome IV)  | 99.93%               |
| PATIENT 13 FOLLOW UP VISIT | LYM-825          | NA    | 0.471                                           | 17                     | NC_027205 (chromosome I)   | 0.10%                |
|                            | LYM-825          |       |                                                 | 20                     | NC_027206 (chromosome II)  | 0.08%                |
|                            | LYM-825          |       |                                                 | 1,834                  | NC_027207 (chromosome III) | 0.30%                |
|                            | LYM-825          |       |                                                 |                        | NC_034969 (chromosome IV)  |                      |
| PATIENT 14                 | LYM-827          | 33.69 | 0.238                                           | 64                     | NC_027205 (chromosome I)   | 0.41%                |
|                            | LYM-827          |       |                                                 | 93                     | NC_027206 (chromosome II)  | 0.51%                |
|                            | LYM-827          |       |                                                 | 1,177                  | NC_027207 (chromosome III) | 0.73%                |
|                            | LYM-827          |       |                                                 | 143                    | NC_034969 (chromosome IV)  | 0.45%                |
| PATIENT 15                 | LYM-828          | 19.04 | 97.747                                          | 32,224,882             | NC_027205 (chromosome I)   | 100.00%              |
|                            | LYM-828          |       |                                                 | 36,546,749             | NC_027206 (chromosome II)  | 99.98%               |
|                            | LYM-828          |       |                                                 | 43,406,519             | NC_027207 (chromosome III) | 99.87%               |
|                            | LYM-828          |       |                                                 | 45,788,830             | NC_034969 (chromosome IV)  | 99.95%               |
| PATIENT 16 FOLLOW UP VISIT | LYM-820          | NA    | 0.338                                           | 30                     | NC_027205 (chromosome I)   | 0.20%                |
|                            | LYM-820          |       |                                                 | 33                     | NC_027206 (chromosome II)  | 0.16%                |
|                            | LYM-820          |       |                                                 | 1,315                  | NC_027207 (chromosome III) | 0.44%                |
|                            | LYM-820          |       |                                                 | 38                     | NC_034969 (chromosome IV)  | 0.19%                |
| Salmon sperm               | Negative control | ND    | 0.881                                           | 0                      | NC_027205 (chromosome I)   | 0.00%                |
| Salmon sperm               | Negative control |       |                                                 | 0                      | NC_027206 (chromosome II)  | 0.00%                |
| Salmon sperm               | Negative control |       |                                                 | 1883*                  | NC_027207 (chromosome III) | 0.25%                |
| Salmon sperm               | Negative control |       |                                                 | 8                      | NC_034969 (chromosome IV)  | 0.01%                |

\*all reads mapped to host (human) 18S rRNA and 28S rRNA

NA-No Amplification

ND-Not Done

Supplemental Table S4. TBDCapSeq analysis of acute Lyme disease and babesiosis samples

| Sample       | Sample type                  | # of raw reads | # of input reads | # of reads mapped to B31 <sup>^</sup> | % of mapped reads | # of reads mapped to 16S-23S rRNA <sup>^</sup> | Non-16S-23S rRNA reads mapped | # of non ribosomal reads mapped to <i>B. microti</i> |
|--------------|------------------------------|----------------|------------------|---------------------------------------|-------------------|------------------------------------------------|-------------------------------|------------------------------------------------------|
| LYM-851      | Extraction control           | 2,392,041      | 1,825,793        | 14                                    | 0.001             | 14                                             | 0                             | 0                                                    |
| LYM-900      | Lyme disease-EM <sup>§</sup> | 2,999,782      | 2,311,272        | 14                                    | 0.001             | 14                                             | 0                             | 0                                                    |
| LYM-901      | Lyme disease-EM              | 3,499,493      | 2,658,689        | 33                                    | 0.001             | 33                                             | 0                             | 0                                                    |
| LYM-902      | Lyme disease-EM              | 3,673,875      | 2,734,197        | 9                                     | 0.000             | 9                                              | 0                             | 0                                                    |
| LYM-903      | Lyme disease-EM              | 2,587,057      | 1,988,271        | 10                                    | 0.001             | 10                                             | 0                             | 0                                                    |
| LYM-905      | Lyme disease-EM              | 2,522,778      | 1,921,627        | 36                                    | 0.002             | 36                                             | 0                             | 0                                                    |
| LYM-906      | Lyme disease-EM              | 1,978,756      | 1,480,265        | 8                                     | 0.001             | 8                                              | 0                             | 0                                                    |
| LYM-907      | Lyme disease-EM              | 2,583,643      | 1,969,052        | 0                                     | 0                 | 0                                              | 0                             | 0                                                    |
| LYM-908      | Lyme disease-EM              | 2,915,520      | 2,215,750        | 10                                    | 0.0005            | 10                                             | 0                             | 0                                                    |
| LYM-909      | Lyme disease-EM              | 2,747,290      | 2,118,051        | 0                                     | 0                 | 0                                              | 0                             | 0                                                    |
| LYM-910      | Lyme disease-EM              | 2,885,228      | 2,198,919        | 9                                     | 0.0004            | 9                                              | 0                             | 0                                                    |
| LYM-911      | Lyme disease-EM              | 2,476,977      | 1,888,135        | 0                                     | 0                 | 0                                              | 0                             | 0                                                    |
| LYM-918      | Lyme disease-EM              | 6,907,453      | 5,199,859        | 2                                     | 0                 | 2                                              | 0                             | 0                                                    |
| LYM-922      | Lyme disease-EM              | 3,670,664      | 2,759,222        | 0                                     | 0                 | 0                                              | 0                             | 0                                                    |
| LYM-920      | babesiosis                   | 6,974,578      | 5,341,651        | 13                                    | 0.0002            | 13                                             | 0                             | 863,208                                              |
| LYM-924      | babesiosis                   | 261,359,660    | 233,945,597      | 621                                   | 0.0003            | 621                                            | 0                             | 228,468,322                                          |
| LYM-926      | babesiosis                   | 173,292,460    | 155,873,645      | 177                                   | 0.0001            | 177                                            | 0                             | 152,509,752                                          |
| Salmon sperm | control                      | 2,811,546      | 1,377,421        | 69                                    | 0.005             | 69                                             | 0                             | 0                                                    |
| Sample       |                              | # raw reads    | # of input reads | # of reads mapped to B31              | % of mapped reads | # of reads mapped to 16S-23S rRNA              | Non-16S-23S reads mapped      | plasmid                                              |
| LYM-904*     | Lyme disease-EM              | 2,385,536      | 1,802,362        | 69                                    | 0.004             | 9                                              | 60                            | -                                                    |
|              |                              |                |                  |                                       |                   |                                                | 14                            | cp32-3                                               |
|              |                              |                |                  |                                       |                   |                                                | 17                            | cp32-6                                               |
|              |                              |                |                  |                                       |                   |                                                | 6                             | cp32-7                                               |
|              |                              |                |                  |                                       |                   |                                                | 13                            | cp32-9                                               |
|              |                              |                |                  |                                       |                   |                                                | 10                            | lp56                                                 |
| LYM-912*     | Lyme disease-EM              | 2,327,392      | 1,766,086        | 72                                    | 0.004             | 15                                             | 57                            | -                                                    |
|              |                              |                |                  |                                       |                   |                                                | 1                             | cp32-3                                               |
|              |                              |                |                  |                                       |                   |                                                | 12                            | cp32-4                                               |
|              |                              |                |                  |                                       |                   |                                                | 11                            | cp32-9                                               |
|              |                              |                |                  |                                       |                   |                                                | 7                             | lp28-3                                               |
|              |                              |                |                  |                                       |                   |                                                | 15                            | lp36                                                 |
|              |                              |                |                  |                                       |                   |                                                | 8                             | lp38                                                 |
|              |                              |                |                  |                                       |                   |                                                | 3                             | cp26                                                 |

\*Samples LYM-904 and LYM-912 were the only samples with authentic reads mapping to *B. burgdorferi*. The last two columns on the right show the read distribution among the genomic segments of *B. burgdorferi*. Both samples had 0 reads mapped to *B. microti*. <sup>^</sup>all reads mapped to B31 16S or 23SrRNA represented non-*Borrelia* reads <sup>§</sup>EM-erythema migrans

**Supplementary Table S5.** Strains selected for probe design.

| <b>Agent</b>                           | <b>Strain</b> |
|----------------------------------------|---------------|
| <i>Borrelia burgdorferi</i>            | B31, N40, 297 |
| <i>Borrelia mayonii</i>                | MN14-1420     |
| <i>Borrelia miyamotoi</i>              | CT14D4        |
| <i>Babesia microti</i>                 | RI            |
| <i>Anaplasma phagocytophilum</i>       | HZ            |
| <i>Ehrlichia muris (eauclairensis)</i> | Wisconsin_h   |
| <i>Ehrlichia chaffeensis</i>           | Jax           |
| <i>Rickettsia parkeri</i>              | Grand Bay     |
| <i>Rickettsia rickettsii</i>           | Hlp#2         |
| Powassan virus                         | LB, LI1       |
| Heartland virus                        | Patient 1     |
